# Supplementary material
Source: publisher figshare collection journal article supplement (https://acs.figshare.com/ndownloader/files/4058848)
Supplement: Supplementary file 1 [file 4058848]

# S-1

## Correlation Queries for Mass Spectrometry Imaging

*Frank Suits<sup>1\*</sup>, Thomas E. Fehniger<sup>2,3</sup>, Ákos Végvári<sup>3,4</sup>, György Marko-Varga<sup>3,5</sup> and Peter Horvatovich<sup>6,8,7</sup>*

<sup>1</sup>IBM T. J. Watson Research Center, PO Box 218, Yorktown Heights, NY 10598

<sup>2</sup>Institute of Clinical Medicine, Tallinn University of Technology, Akadeemia tee 15, 12618 Tallinn, Estonia

<sup>3</sup>Clinical Protein Science & Imaging, Biomedical Center, Dept. of Measurement Technology and Industrial Electrical Engineering, Lund University, BMC C13, SE-221 84 Lund, Sweden

<sup>4</sup>CREATE Health, Lund University, Lund, Sweden

<sup>5</sup>First Department of Surgery, Tokyo Medical University, Tokyo, Japan

<sup>6</sup>Department of Analytical Biochemistry, University of Groningen, Antonius Deusinglaan 1, The Netherlands,

<sup>7</sup>Netherlands Bioinformatics Centre, Geert Grooteplein 28, 6525 GA Nijmegen, The Netherlands

<sup>8</sup>Netherlands Proteomics Centre, Padualaan 8, 3584 CH Utrecht, the Netherlands

### Abstract

Supplemental material:

1. Pseudocode for the Pearson correlation calculation

## S-2

1. Pseudocode to calculate the correlation of two slices:
  - a. Given two “slices,” A and B, of the mass-spectrometry imaging data set, each consisting of a rectangular array of “pixels” corresponding to scan points, and the value at each pixel representing the total ion count in some small range of  $m/z$
  - b. Find mean of all pixel intensities in SliceA and SliceB
  - c. Subtract the mean from each pixel value of each slice so the mean intensity of each slice is zero
  - d. Find the sum of the squares of each slice
  - e. Divide each pixel by the sum of squares in (d) so the “norm” of each slice is one
  - f. The correlation is then the dot product of the two slices, or the sum of the products of each pixel in A with the corresponding pixel in B
  - g. The correlation will range from -1 to 1 and is independent of the range of intensity values in each slice. 1 means fully correlated; -1 means anti-correlated.
  - h. If a mask is involved, perform the above calculation but only using the pixels covered by the mask
